# Supplementary material for: Experimental Genetics of Plasmodium berghei NFU in the Apicoplast Iron-Sulfur Cluster Biogenesis Pathway
Source: PubMed Central journal article supplement (PMC3689711; doi:10.1371/journal.pone.0067269), 2013-06-21
Supplement: pone.0067269.s001.pdf [file pone.0067269.s001.pdf]

**Supplemental information for**

**Experimental Genetics of *Plasmodium berghei* NFU  
in the Apicoplast Iron-Sulfur Cluster Biogenesis Pathway**

Joana M. Haussig, Kai Matuschewski, Taco W.A. Kooij

**Contents:**

- **Supplemental Figure S1**
- **Supplemental Table S1 and S2**

Haussig et al., Figure S1

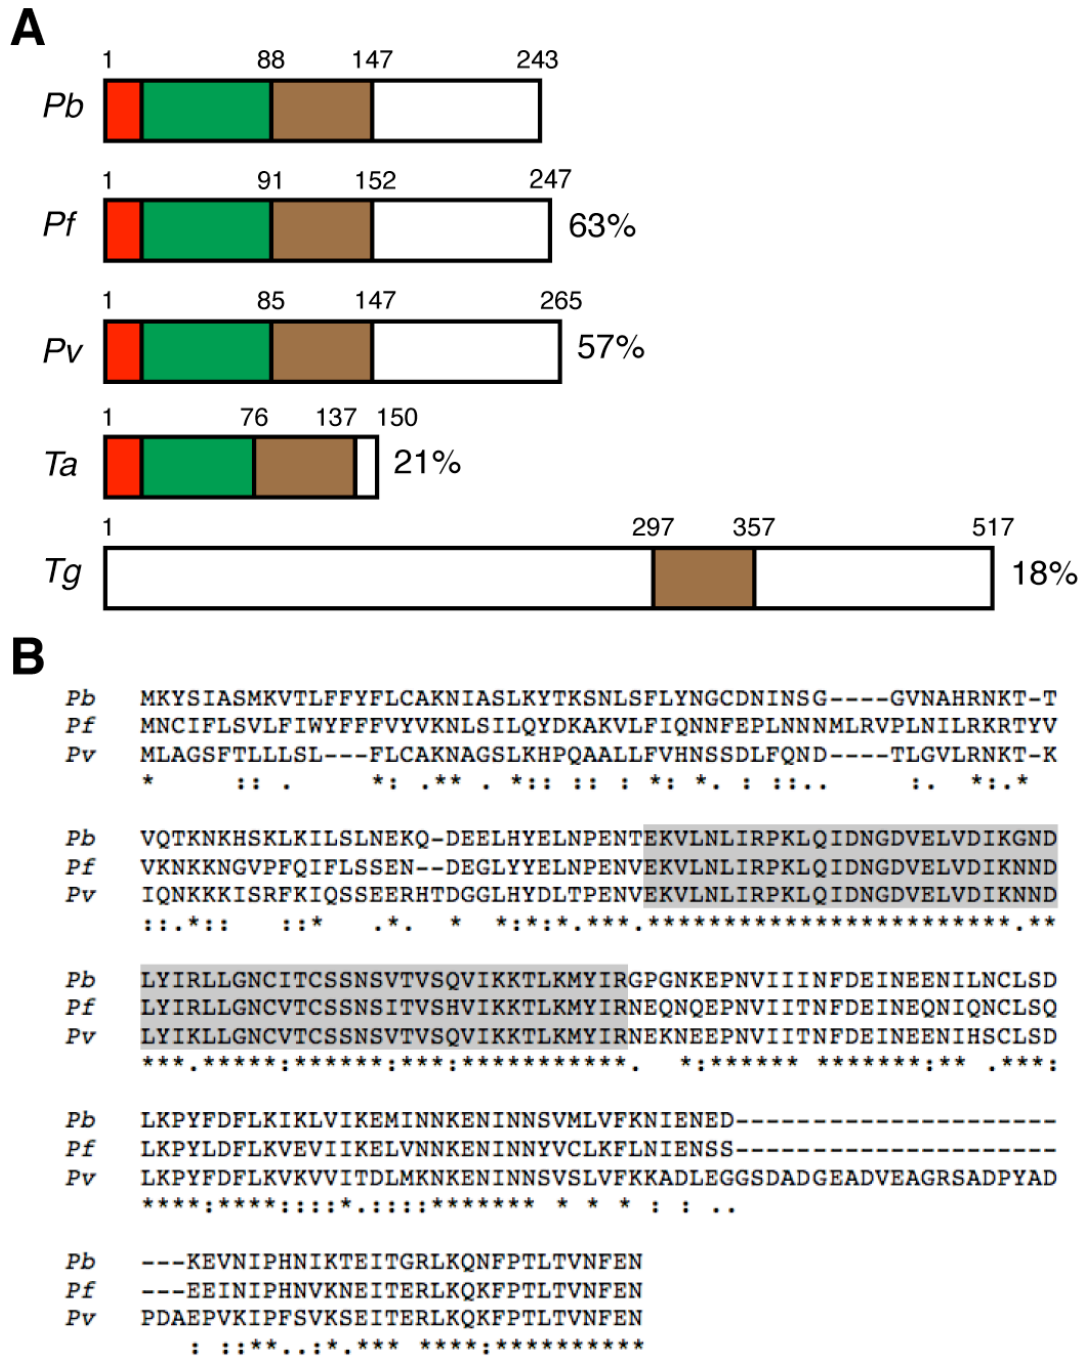

**Figure S1. Apicomplexan NFUapi proteins.** (A) Primary structure of representative apicomplexan NFUapi proteins. Shown are the overall sequence structures and amino acid sequence identities of NFUapi orthologs in *P. falciparum* (PF3D7\_0921400), *P. vivax* (PVX\_099490), *Theileria annulata* (TA19885), and *Toxoplasma gondii* (TGME49\_021920) compared with *P. berghei* NFUapi (PBANKA\_082230). Signal peptide (red), apicoplast-targeting sequence (green), and the NifU-like domain (brown) are shown. (B) Sequence alignment of three *Plasmodium* NFUapi proteins. The NifU-like domain (gray shading) is well conserved.

**Table S1.** NifU-like domain containing proteins.

| Species                      | Gene Name       | Gene ID                     | Source        | Species                          | Gene Name      | Gene ID                | Source    |
|------------------------------|-----------------|-----------------------------|---------------|----------------------------------|----------------|------------------------|-----------|
| <i>APICOMPLEXA</i>           |                 |                             |               | <i>KINETOPLASTIDA</i>            |                |                        |           |
| <i>Plasmodium berghei</i>    | <i>PbNFUapi</i> | PBANKA_082230               | PlasmoDB      | <i>Leishmania major</i>          | <i>LmjNFU1</i> | LmjF.26.0190           | TriTrypDB |
|                              | <i>PbNFU1</i>   | PBANKA_083170               | PlasmoDB      |                                  | <i>LmjNFU2</i> | LmjF.36.0880           | TriTrypDB |
|                              | <i>PbISU</i>    | PBANKA_131820               | PlasmoDB      |                                  | <i>LmjISU</i>  | LmjF.35.3620           | TriTrypDB |
| <i>Plasmodium chabaudi</i>   | <i>PcNFUapi</i> | PCHAS_082260                | PlasmoDB      | <i>Trypanosoma brucei</i>        | <i>TbNFU1</i>  | Tbg972.7.1730          | TriTrypDB |
|                              | <i>PcNFU1</i>   | PCHAS_083200                | PlasmoDB      |                                  | <i>TbNFU2</i>  | Tbg972.10.6450         | TriTrypDB |
|                              | <i>PcISU</i>    | PCHAS_132150                | PlasmoDB      |                                  | <i>TbISU</i>   | Tbg972.9.6980          | TriTrypDB |
| <i>Plasmodium yoelii</i>     | <i>PyNFUapi</i> | PY02489                     | PlasmoDB      | <i>Trypanosoma cruzi</i>         | <i>TcNFU1</i>  | Tc00.1047053508207.130 | TriTrypDB |
|                              | <i>PyNFU1</i>   | PY06884                     | PlasmoDB      |                                  | <i>TcNFU2</i>  | Tc00.1047053506679.60  | TriTrypDB |
|                              | <i>PyISU</i>    | PY00856                     | PlasmoDB      |                                  | <i>TcISU</i>   | Tc00.1047053507009.90  | TriTrypDB |
| <i>Plasmodium knowlesi</i>   | <i>PkNFUapi</i> | PKH_071860                  | PlasmoDB      | <i>PLANTAE</i>                   |                |                        |           |
|                              | <i>PkNFU1</i>   | PKH_072920                  | PlasmoDB      | <i>Chlamydomonas reinhardtii</i> | <i>CrNIFU1</i> | XP_001695148           | GenBank   |
|                              | <i>PkISU</i>    | PKH_125200                  | PlasmoDB      |                                  | <i>CrNIFU2</i> | XP_001690805           | GenBank   |
| <i>Plasmodium vivax</i>      | <i>PvNFUapi</i> | PVX_099490                  | PlasmoDB      |                                  | <i>CrNIFU3</i> | XP_001691526           | GenBank   |
|                              | <i>PvNFU1</i>   | PVX_087160                  | PlasmoDB      | <i>CrISU1</i>                    | XP_001693712   | GenBank                |           |
|                              | <i>PvISU</i>    | PVX_117755                  | PlasmoDB      | <i>Arabidopsis thaliana</i>      | <i>AtNFU1</i>  | NP_567219              | GenBank   |
| <i>Plasmodium falciparum</i> | <i>PfNFUapi</i> | PF3D7_0921400               | PlasmoDB      |                                  | <i>AtNFU2</i>  | NP_568715.1            | GenBank   |
|                              | <i>PfNFU1</i>   | PF3D7_0930900               | PlasmoDB      |                                  | <i>AtNFU3</i>  | NP_567735              | GenBank   |
|                              | <i>PfISU</i>    | PF3D7_1454500               | PlasmoDB      |                                  | <i>AtNFU4</i>  | NP_566673              | GenBank   |
| <i>Babesia bovis</i>         | <i>BbNFU1</i>   | BBOV_III006970              | PiroplasmaDB  |                                  | <i>AtNFU5</i>  | NP_175550              | GenBank   |
|                              | <i>BbISU</i>    | BBOV_IV004050               | PiroplasmaDB  | <i>AtISU1</i>                    | NP_193953      | GenBank                |           |
| <i>Theileria annulata</i>    | <i>TaNFUapi</i> | TA19885                     | PiroplasmaDB  | <i>AtISU2</i>                    | NP_186751      | GenBank                |           |
|                              | <i>TaNFU1</i>   | TA10900                     | PiroplasmaDB  | <i>AtISU3</i>                    | NP_192317      | GenBank                |           |
|                              | <i>TaISU</i>    | TA19345                     | PiroplasmaDB  | <i>FUNGI</i>                     |                |                        |           |
| <i>Theileria parva</i>       | <i>TpNFUapi</i> | TP01_0062                   | PiroplasmaDB  | <i>Cryptococcus neoformans</i>   | <i>CnNfu_N</i> | XP_571879              | GenBank   |
|                              | <i>TpNFU1</i>   | TP04_0610                   | PiroplasmaDB  |                                  | <i>CnlscU</i>  | XP_569269              | GenBank   |
|                              | <i>TpISU</i>    | TP01_0192                   | PiroplasmaDB  | <i>Saccharomyces cerevisiae</i>  | <i>ScNfu1</i>  | NP_012884              | GenBank   |
| <i>Cryptosporidium muris</i> | <i>CmISU</i>    | CMU_027160                  | CryptoDB      |                                  | <i>ScIsu1</i>  | NP_015190              | GenBank   |
|                              | <i>CpISU</i>    | cgd6_1050                   | CryptoDB      |                                  | <i>ScIsu2</i>  | NP_014869              | GenBank   |
| <i>Eimeria tenella</i>       | <i>EtNFUapi</i> | ETH_00036850 + ETH_00021275 | ToxoDB        | <i>ANIMALIA</i>                  |                |                        |           |
| <i>Neospora caninum</i>      | <i>EtNFU1</i>   | ETH_00027735                | ToxoDB        | <i>Mus musculus</i>              | <i>MmNfu1</i>  | NP_001164062           | GenBank   |
|                              | <i>EtISU</i>    | ETH_00024750                | ToxoDB        |                                  | <i>Mmlscu</i>  | NP_079802              | GenBank   |
|                              | <i>NcNFUapi</i> | NCLIV_005330                | ToxoDB        | <i>Homo sapiens</i>              | <i>HsNFU1</i>  | NP_056515              | GenBank   |
| <i>NcNFU1</i>                | NCLIV_013030    | ToxoDB                      | <i>HsISCU</i> |                                  | NP_055116      | GenBank                |           |
| <i>Toxoplasma gondii</i>     | <i>NcISU</i>    | NCLIV_051300                | ToxoDB        | <i>BACTERIA</i>                  |                |                        |           |
|                              | <i>TgNFUapi</i> | TGME49_021920               | ToxoDB        | <i>Azotobacter vinelandii</i>    | <i>AvNifU</i>  | YP_002797400           | GenBank   |
|                              | <i>TgNFU1</i>   | TGME49_012930               | ToxoDB        |                                  |                |                        |           |
| <i>TgISU</i>                 | TGME49_037560   | ToxoDB                      |               |                                  |                |                        |           |

**Table S2.** Primer sequences.

| Primer Name <sup>a</sup> | Primer Sequence (REase sites underlined) | REase   | Size WT (bp) <sup>b</sup> | Size INT (bp) <sup>c</sup> |
|--------------------------|------------------------------------------|---------|---------------------------|----------------------------|
| 5'PbHSP70rev             | CAATTTGTTGTACATAAAATAGGCAG               |         |                           |                            |
| 5'PbDHFRrev              | ATGAAATACCGCTCCATTTTTCC                  |         |                           |                            |
| mCherryRev               | CCCTCCATGTGAACCTTGAAG                    |         |                           |                            |
| TV-5'NFU-F               | TATCCGCGGTTTTTCTATAAAATGTGTGTGTAATGC     | SacII   | 599                       |                            |
| TV-5'NFU-R               | AAAGATATCACTCACAAAAATAAGCACATGATTG       | EcoRV   |                           |                            |
| TV-C-NFU-F               | AAACCGCGGCGTGTAGCTCAAATAGTGTAAGT         | SacII   | 576                       |                            |
| TV-C-NFU-R               | TAAGATATCATTTTTCAAATTAACAGTTAATGTTGGAAA  | EcoRV   |                           |                            |
| TV-3'NFU-F               | TATAAGCTTCAGCGGCTAGTCAATCTAATC           | HindIII | 439                       |                            |
| TV-3'NFU-R               | TAAGGTACCGTTCATTTAAAACACCAGCGAG          | KpnI    |                           |                            |
| GT-5'NFU-F               | ATTTTTCTCTGGTTTTTCATTTATATTTTC           |         | 960                       | 958                        |
| GT-5'NFU-R               | TTGTTTTATTTCTGTGTGCATTAACC               |         |                           |                            |
| GT-C-NFU-F               | GCCCCAAATTACAAATAGATAATGG                |         | 1106 <sup>d</sup>         | 758 <sup>d</sup>           |
| GT-3'NFU-F               | GAAAATGAAGATAAGGAAGTAAATATACC            |         | 702                       |                            |
| GT-3'NFU-R               | TAATATACATAAATGTTATTGGGATCTTTTG          |         |                           | 1210                       |

<sup>a</sup> TV and GT indicate primers designed for the generation of Transfection Vectors and GenoTyping.

<sup>b</sup> Sizes of the PCR products of forward (F) and reverse (R) primers on WT gDNA.

<sup>c</sup> Sizes of the respective integration-specific PCR products; forward 5' gene-specific primers combined with 5'PbHSP70rev and reverse 3' gene-specific primers combined with 5'PbDHFRrev.

<sup>d</sup> WT-specific reaction with TV-3'NFU-R; integration-specific reaction with mCherryRev.
